# Supplementary material for: A Semisupervised Cascade Classification Algorithm
Source: Hindawi journal article supplement (doi:10.1155/2016/5919717), 2016-01-01
Supplement: f1 [file 5919717.f1.xlsx]

## Sheet: Labeled Ratio = 10%
Datasets	Self - Cascade(NB,C45)	Self-Training (C45)	Self-Training (NB)	Co-Training (C45)	Co-Training (NB)	Democratic-Co	SETRED	TriTraining (C45)	TriTraining (NB)	DE-TriTraining (C45)	DE-TriTraining (NB)	CoForest	Rasco (C45)	Rasco (NB)	Co-Bagging (C45)	Co-Bagging (NB)	Rel-Rasco (C45)	Rel-Rasco (NB)	ADE-CoForest
appendicitis	0.821818	0.8318	0.8018	0.8318	0.8018	0.8218	0.7373	0.8045	0.8018	0.8118	0.8218	0.8227	0.8018	0.8127	0.8045	0.8018	0.8018	0.7927	0.8118
automobile	0.417399	0.4052	0.3218	0.373	0.3541	0.3601	0.4388	0.3889	0.3101	0.4138	0.2925	0.4569	0.3399	0.4016	0.3366	0.3222	0.2978	0.4403	0.4066
banana	0.854906	0.8479	0.5857	0.8481	0.6096	0.8417	0.8638	0.8481	0.6147	0.8621	0.6066	0.527	0.8494	0.6087	0.8553	0.6009	0.8426	0.6132	0.5521
breast	0.73652	0.7216	0.7331	0.6774	0.7401	0.7287	0.6835	0.7216	0.7365	0.7123	0.7433	0.7339	0.7082	0.709	0.7252	0.7335	0.6939	0.7336	0.7196
bupa	0.590973	0.5392	0.5502	0.5739	0.5156	0.5104	0.5339	0.5742	0.5331	0.5782	0.5644	0.5851	0.5827	0.5165	0.6119	0.5472	0.5719	0.5357	0.5538
chess	0.940851	0.9543	0.801	0.9515	0.8104	0.9199	0.8104	0.9578	0.8407	0.9118	0.8145	0.944	0.9518	0.8357	0.9543	0.8214	0.9474	0.8392	0.8354
cleveland	0.543117	0.5248	0.5121	0.5736	0.5499	0.5223	0.5294	0.4761	0.5563	0.4855	0.5695	0.5366	0.4842	0.5159	0.5335	0.5428	0.4989	0.5534	0.5434
coil2000	0.932093	0.9373	0.9148	0.9403	0.9151	0.9322	0.8926	0.9357	0.9222	0.9383	0.9381	0.9299	0.9395	0.9245	0.9348	0.9222	0.9393	0.9215	0.9343
crx	0.848266	0.866	0.774	0.8159	0.794	0.8495	0.8111	0.8555	0.7789	0.851	0.7937	0.8206	0.8284	0.7354	0.8496	0.7667	0.8525	0.7623	0.8387
dermatology	0.88474	0.8562	0.5593	0.8429	0.667	0.876	0.9182	0.8816	0.5595	0.8589	0.7533	0.9047	0.3759	0.6313	0.876	0.5557	0.3794	0.6404	0.8565
flare	0.74016	0.7214	0.7083	0.5742	0.6952	0.7214	0.6445	0.7158	0.7411	0.697	0.6951	0.4024	0.5863	0.5967	0.714	0.71	0.6089	0.5994	0.3649
glass	0.560395	0.4847	0.4433	0.4504	0.4744	0.4868	0.5402	0.4921	0.4435	0.4222	0.3913	0.5589	0.3936	0.3991	0.4898	0.4293	0.3602	0.4043	0.4648
haberman	0.705699	0.7054	0.7113	0.719	0.7448	0.7156	0.6211	0.7088	0.7447	0.7255	0.7415	0.6014	0.7158	0.7254	0.7122	0.7445	0.7123	0.7352	0.6602
heart	0.759259	0.6778	0.7	0.7	0.8	0.8	0.7444	0.7148	0.7741	0.7926	0.763	0.6926	0.6926	0.8	0.7037	0.7296	0.6519	0.7926	0.7852
housevotes	0.919078	0.9414	0.8771	0.8225	0.8941	0.8899	0.9129	0.9158	0.8914	0.864	0.8856	0.9216	0.806	0.8869	0.9195	0.8828	0.8027	0.8891	0.9044
iris	0.873333	0.84	0.78	0.8467	0.8067	0.9133	0.9133	0.7267	0.8133	0.92	0.9	0.9333	0.52	0.7667	0.8	0.7867	0.6067	0.8	0.92
led7digit	0.624	0.614	0.548	0.514	0.572	0.616	0.618	0.604	0.576	0.59	0.53	0.634	0.376	0.42	0.564	0.562	0.362	0.426	0.628
lymphography	0.781877	0.6312	0.04	0.5726	0.4734	0.4901	0.6833	0.6118	0.4724	0.6571	0.559	0.6464	0.5809	0.5341	0.5948	0.6897	0.5769	0.2943	0.7074
magic	0.820978	0.8217	0.7218	0.8204	0.7208	0.7842	0.784	0.8245	0.7269	0.8138	0.7297	0.8436	0.8213	0.7272	0.8319	0.7272	0.8207	0.7278	0.814
mammographic	0.7964	0.8025	0.7347	0.8074	0.7441	0.7963	0.758	0.8183	0.7491	0.7965	0.7862	0.7941	0.8024	0.7564	0.8085	0.7456	0.812	0.7697	0.7855
movement_libras	0.194444	0.2556	0.1944	0.2361	0.1861	0.1972	0.4444	0.275	0.1889	0.1694	0.1917	0.3111	0.1611	0.25	0.2417	0.1639	0.1611	0.1972	0.2111
mushroom	0.992196	0.9966	0.9253	0.9968	0.9204	0.9927	0.9945	0.9955	0.9301	0.9913	0.9313	0.9084	0.9941	0.9329	0.9954	0.9305	0.9938	0.9284	0.9078
nursery	0.909182	0.9064	0.8488	0.9034	0.8941	0.8951	0.8101	0.9039	0.8941	0.8867	0.8816	0.3809	0.6258	0.8397	0.9006	0.8848	0.5578	0.8614	0.3809
page-blocks	0.949743	0.9523	0.8598	0.9492	0.8785	0.9077	0.9359	0.9561	0.856	0.9368	0.9375	0.9585	0.9097	0.5337	0.9567	0.9107	0.9126	0.7617	0.9402
penbased	0.917216	0.8916	0.8178	0.8957	0.8534	0.9474	0.9778	0.9027	0.8536	0.8939	0.8537	0.9551	0.8669	0.8534	0.9049	0.8533	0.8744	0.8549	0.9581
phoneme	0.793662	0.777	0.7348	0.7652	0.742	0.7874	0.8046	0.777	0.7526	0.7772	0.767	0.8007	0.7694	0.7615	0.7889	0.7515	0.7672	0.7604	0.7896
pima	0.665623	0.6643	0.685	0.6704	0.7033	0.6967	0.6565	0.6564	0.7007	0.6553	0.7073	0.6627	0.6628	0.7084	0.6342	0.6914	0.5965	0.7033	0.6787
ring	0.976081	0.8396	0.9793	0.8366	0.9801	0.8741	0.6691	0.8542	0.9797	0.6655	0.8469	0.8823	0.8214	0.9786	0.8582	0.9793	0.8136	0.9788	0.6104
satimage	0.810417	0.8045	0.7859	0.8056	0.7932	0.8462	0.857	0.8224	0.7953	0.8154	0.7978	0.86	0.7784	0.7883	0.8205	0.7929	0.7751	0.7902	0.858
segment	0.900433	0.89	0.6952	0.9017	0.7719	0.9026	0.9065	0.9	0.7909	0.881	0.79	0.903	0.7874	0.6381	0.916	0.7541	0.8078	0.6831	0.8853
spambase	0.868811	0.8669	0.8358	0.8884	0.8369	0.8777	0.8281	0.881	0.836	0.8545	0.8225	0.9186	0.8714	0.8116	0.8951	0.8569	0.8716	0.8083	0.8586
spectfheart	0.778775	0.6819	0.7228	0.7235	0.7115	0.7379	0.7201	0.7574	0.7604	0.7198	0.7295	0.7751	0.6677	0.5957	0.7571	0.79	0.7013	0.6066	0.7684
splice	0.928213	0.8266	0.8527	0.831	0.9125	0.8978	0.6997	0.8254	0.9185	0.7931	0.879	0.5066	0.7984	0.9013	0.8248	0.9009	0.7962	0.9053	0.4843
thyroid	0.992083	0.9922	0.9049	0.9924	0.9282	0.9393	0.909	0.9918	0.9267	0.9322	0.9335	0.9858	0.9683	0.8981	0.9906	0.9254	0.9685	0.9021	0.9293
tic-tac-toe	0.70455	0.7108	0.6211	0.6931	0.6618	0.69	0.7255	0.7088	0.6619	0.69	0.667	0.5971	0.7098	0.6702	0.7035	0.6535	0.6838	0.6597	0.6253
titanic	0.77465	0.7751	0.7706	0.7783	0.7706	0.7756	0.6402	0.7765	0.7701	0.691	0.6737	0.7065	0.7724	0.7683	0.7837	0.7697	0.7769	0.7742	0.6188
twonorm	0.969189	0.8136	0.9768	0.8085	0.977	0.9645	0.9358	0.8616	0.9766	0.837	0.9762	0.8989	0.7986	0.9768	0.8597	0.9774	0.8108	0.9769	0.9164
wine	0.93268	0.7405	0.9376	0.8075	0.898	0.9493	0.9438	0.8203	0.898	0.9324	0.9493	0.8588	0.5598	0.8258	0.7866	0.8255	0.5846	0.8265	0.8873
wisconsin	0.942205	0.9093	0.9006	0.9064	0.9446	0.965	0.9478	0.9312	0.9358	0.9448	0.9622	0.9358	0.8615	0.9651	0.9284	0.9197	0.8687	0.9651	0.9563
zoo	0.744444	0.6794	0.9147	0.6356	0.8831	0.9314	0.9347	0.7192	0.9131	0.5694	0.5794	0.9089	0.4533	0.7233	0.7456	0.8692	0.5083	0.7294	0.5794
	Self - Cascade(NB,C45)	Self-Training (C45)	Self-Training (NB)	Co-Training (C45)	Co-Training (NB)	Democratic-Co	SETRED	TriTraining (C45)	TriTraining (NB)	DE-TriTraining (C45)	DE-TriTraining (NB)	CoForest	Rasco (C45)	Rasco (NB)	Co-Bagging (C45)	Co-Bagging (NB)	Rel-Rasco (C45)	Rel-Rasco (NB)	ADE-CoForest
AVERAGE ACCURACY	0.797412	0.767465	0.719555	0.757025	0.748258	0.783795	0.769495	0.772325	0.748133	0.758478	0.743905	0.750112	0.699873	0.718115	0.772808	0.74556	0.69926	0.723605	0.72327

## Sheet: Labeled Ratio = 20%
Datasets	Self - Cascade(NB,C45)	Self-Training (C45)	Self-Training (NB)	Co-Training (C45)	Co-Training (NB)	Democratic-Co	SETRED	TriTraining (C45)	TriTraining (NB)	DE-TriTraining (C45)	DE-TriTraining (NB)	CoForest	Rasco (C45)	Rasco (NB)	Co-Bagging (C45)	Co-Bagging (NB)	Rel-Rasco (C45)	Rel-Rasco (NB)	ADE-CoForest
appendicitis	0.850909	0.8509	0.8773	0.85	0.8873	0.86	0.81	0.8318	0.8682	0.8409	0.8509	0.8773	0.8018	0.8127	0.8318	0.8318	0.8018	0.7927	0.8409
automobile	0.473949	0.5158	0.356	0.4803	0.4375	0.4744	0.4951	0.4938	0.4496	0.412	0.4289	0.5472	0.3399	0.4016	0.5355	0.4412	0.2978	0.4403	0.4544
banana	0.870566	0.8804	0.5947	0.8743	0.6134	0.8794	0.8691	0.8736	0.6125	0.8774	0.6028	0.5411	0.8494	0.6087	0.8804	0.6123	0.8426	0.6132	0.5517
breast	0.729113	0.7156	0.7404	0.7227	0.7399	0.7184	0.6788	0.7225	0.7399	0.7475	0.7399	0.7265	0.7082	0.709	0.7224	0.7469	0.6939	0.7336	0.6886
bupa	0.533378	0.6055	0.5303	0.6055	0.5329	0.5504	0.5655	0.6199	0.5414	0.5589	0.5408	0.6023	0.5827	0.5165	0.6026	0.551	0.5719	0.5357	0.5773
chess	0.962138	0.9778	0.8326	0.9759	0.8445	0.9393	0.8489	0.9781	0.8611	0.9333	0.8342	0.9506	0.9518	0.8357	0.9778	0.8501	0.9474	0.8392	0.8833
cleveland	0.582572	0.4929	0.5217	0.527	0.5834	0.553	0.5257	0.5399	0.5904	0.5128	0.5764	0.5326	0.4842	0.5159	0.5535	0.5705	0.4989	0.5534	0.5431
coil2000	0.939523	0.94	0.9063	0.9402	0.9068	0.933	0.8994	0.9371	0.9167	0.9366	0.9339	0.9273	0.8932	0.9245	0.9338	0.9158	0.9395	0.9215	0.9356
crx	0.83722	0.8571	0.7817	0.8498	0.7912	0.8587	0.8142	0.854	0.7957	0.8555	0.8108	0.8405	0.8284	0.7354	0.851	0.7927	0.8525	0.7623	0.8387
dermatology	0.93825	0.91	0.7811	0.879	0.8371	0.93	0.9467	0.9214	0.7618	0.8739	0.863	0.9244	0.3759	0.6313	0.9186	0.7981	0.3794	0.6404	0.9385
flare	0.735399	0.728	0.7335	0.6897	0.7383	0.7402	0.666	0.727	0.7392	0.7082	0.7233	0.4156	0.5863	0.5967	0.7176	0.7439	0.6089	0.5994	0.3997
glass	0.548129	0.5085	0.4525	0.5348	0.4699	0.4799	0.5935	0.6104	0.4671	0.5036	0.4584	0.6338	0.3936	0.3991	0.5631	0.4861	0.3602	0.4043	0.5549
haberman	0.712151	0.7089	0.7278	0.7353	0.7415	0.7222	0.66	0.7089	0.7285	0.7322	0.7416	0.6403	0.7158	0.7254	0.7348	0.7285	0.7123	0.7352	0.6709
heart	0.807407	0.7519	0.8037	0.7556	0.8259	0.8222	0.7741	0.7926	0.8407	0.7556	0.8037	0.7296	0.6926	0.8	0.7481	0.8185	0.6519	0.7926	0.7519
housevotes	0.958649	0.9586	0.8819	0.9363	0.8932	0.9023	0.8957	0.9586	0.8839	0.9099	0.884	0.9451	0.806	0.8869	0.9528	0.8895	0.8027	0.8891	0.9209
iris	0.926667	0.8933	0.9067	0.8933	0.92	0.9533	0.92	0.88	0.9467	0.96	0.9467	0.94	0.52	0.7667	0.8667	0.9467	0.6067	0.8	0.9133
led7digit	0.648	0.678	0.582	0.644	0.626	0.662	0.628	0.676	0.644	0.686	0.632	0.678	0.376	0.42	0.658	0.622	0.362	0.426	0.662
lymphography	0.796639	0.7055	0.0133	0.775	0.421	0.4612	0.7392	0.7545	0.5091	0.7461	0.5929	0.6929	0.5809	0.5341	0.7474	0.7529	0.5769	0.2943	0.7109
magic	0.837802	0.8304	0.7249	0.832	0.7246	0.8017	0.7934	0.8335	0.7281	0.825	0.7297	0.8517	0.8116	0.7272	0.8409	0.7262	0.8193	0.7278	0.822
mammographic	0.822814	0.8229	0.7759	0.8228	0.7794	0.8084	0.7473	0.8157	0.7843	0.8087	0.7829	0.7872	0.8024	0.7564	0.8248	0.7819	0.812	0.7697	0.8013
movement_libras	0.386111	0.3472	0.3667	0.3917	0.4028	0.3667	0.6	0.3833	0.3944	0.2889	0.2806	0.4611	0.175	0.25	0.3556	0.3389	0.1667	0.1972	0.3417
mushroom	0.996623	0.9991	0.9403	0.9991	0.9366	0.998	0.9984	0.9989	0.9441	0.997	0.9474	0.9096	0.9941	0.9329	0.9989	0.9439	0.9938	0.9284	0.9086
nursery	0.934028	0.9235	0.8593	0.926	0.8971	0.9108	0.8327	0.9258	0.8971	0.9072	0.8914	0.3842	0.6325	0.8397	0.9235	0.8934	0.5942	0.8614	0.3842
page-blocks	0.958515	0.9602	0.8768	0.9609	0.8949	0.9115	0.9448	0.9611	0.8942	0.9454	0.9355	0.9585	0.9064	0.5337	0.9613	0.9123	0.9114	0.7617	0.9444
penbased	0.936952	0.9241	0.8422	0.9247	0.8511	0.9632	0.9871	0.9287	0.8512	0.9293	0.8512	0.9656	0.8669	0.8534	0.937	0.8506	0.8744	0.8549	0.9715
phoneme	0.811982	0.7839	0.7413	0.8024	0.7437	0.8055	0.8344	0.7977	0.7507	0.8029	0.769	0.8305	0.7694	0.7615	0.8244	0.7478	0.7672	0.7604	0.8157
pima	0.682525	0.681	0.7255	0.6874	0.71	0.7319	0.6369	0.6939	0.7176	0.6849	0.7176	0.7108	0.6628	0.7084	0.7084	0.7254	0.5965	0.7033	0.6862
ring	0.977838	0.8658	0.9788	0.863	0.9791	0.8969	0.7007	0.8795	0.9788	0.7142	0.8758	0.8926	0.8214	0.9786	0.8918	0.9795	0.8136	0.9788	0.6755
satimage	0.831699	0.8238	0.7905	0.8261	0.7977	0.8612	0.874	0.8353	0.7983	0.8318	0.8006	0.8724	0.7784	0.7883	0.841	0.7961	0.7751	0.7902	0.8687
segment	0.924242	0.9264	0.7165	0.9294	0.7853	0.9307	0.9338	0.9247	0.7939	0.9139	0.7974	0.9338	0.7874	0.6381	0.9277	0.7835	0.8078	0.6831	0.916
spambase	0.907121	0.8912	0.8255	0.8908	0.8286	0.8941	0.8529	0.8941	0.8279	0.8695	0.8121	0.9308	0.8714	0.8116	0.896	0.8303	0.8716	0.8083	0.8838
spectfheart	0.727208	0.7192	0.7081	0.7611	0.6858	0.7305	0.7085	0.7491	0.7268	0.7426	0.7496	0.7906	0.6677	0.5957	0.7833	0.7231	0.7013	0.6066	0.7721
splice	0.93605	0.8834	0.906	0.8793	0.9379	0.9119	0.6978	0.8843	0.9417	0.8292	0.9172	0.5213	0.7984	0.9013	0.8875	0.9276	0.7962	0.9053	0.4966
thyroid	0.993333	0.9935	0.8988	0.9932	0.9267	0.9419	0.9149	0.9939	0.9264	0.9371	0.9311	0.9882	0.9683	0.8981	0.9942	0.9229	0.9685	0.9021	0.9329
tic-tac-toe	0.737982	0.7568	0.6555	0.7213	0.69	0.7329	0.7621	0.7505	0.7004	0.6931	0.689	0.6065	0.7098	0.6702	0.7286	0.69	0.6838	0.6597	0.6524
titanic	0.783739	0.7824	0.7733	0.7824	0.7706	0.7797	0.6407	0.7815	0.7706	0.6915	0.7088	0.7229	0.7724	0.7683	0.7828	0.7701	0.7769	0.7742	0.6438
twonorm	0.972027	0.8165	0.9765	0.8276	0.9769	0.9707	0.9411	0.8674	0.9765	0.8318	0.9769	0.9032	0.7986	0.9768	0.8741	0.9769	0.8108	0.9769	0.9149
wine	0.920915	0.8369	0.9373	0.7863	0.9487	0.9542	0.9154	0.8422	0.9601	0.8931	0.966	0.8422	0.5598	0.8258	0.8255	0.9379	0.5846	0.8265	0.916
wisconsin	0.953441	0.9343	0.946	0.9343	0.9578	0.9637	0.9463	0.9253	0.9608	0.946	0.9548	0.9359	0.8615	0.9651	0.936	0.949	0.8687	0.9651	0.9506
zoo	0.823611	0.8311	0.92	0.7344	0.9067	0.89	0.9372	0.8264	0.9022	0.7869	0.7869	0.8972	0.4533	0.7233	0.8231	0.9106	0.5083	0.7294	0.7619
	Self - Cascade(NB,C45)	Self-Training (C45)	Self-Training (NB)	Co-Training (C45)	Co-Training (NB)	Democratic-Co	SETRED	TriTraining (C45)	TriTraining (NB)	DE-TriTraining (C45)	DE-TriTraining (NB)	CoForest	Rasco (C45)	Rasco (NB)	Co-Bagging (C45)	Co-Bagging (NB)	Rel-Rasco (C45)	Rel-Rasco (NB)	ADE-CoForest
AVERAGE ACCURACY	0.81768	0.800308	0.74773	0.798623	0.773545	0.8049	0.788258	0.809323	0.778065	0.78551	0.770893	0.771048	0.698905	0.718115	0.809058	0.78041	0.70025	0.723605	0.747435

## Sheet: Labeled Ratio = 30%
Datasets	Self - Cascade(NB,C45)	Self-Training (C45)	Self-Training (NB)	Co-Training (C45)	Co-Training (NB)	Democratic-Co	SETRED	TriTraining (C45)	TriTraining (NB)	DE-TriTraining (C45)	DE-TriTraining (NB)	CoForest	Rasco (C45)	Rasco (NB)	Co-Bagging (C45)	Co-Bagging (NB)	Rel-Rasco (C45)	Rel-Rasco (NB)	ADE-CoForest
appendicitis	0.83	0.8409	0.8573	0.8409	0.8582	0.8691	0.8109	0.8327	0.8591	0.8091	0.8873	0.82	0.83	0.8491	0.8318	0.84	0.84	0.8773	0.8491
automobile	0.523204	0.5484	0.456	0.571	0.4993	0.5432	0.5515	0.5707	0.5071	0.45	0.4052	0.6416	0.524	0.4811	0.5737	0.5402	0.5268	0.5245	0.4533
banana	0.881887	0.8819	0.6015	0.8785	0.614	0.8728	0.87	0.8806	0.613	0.8834	0.6079	0.5379	0.8768	0.613	0.8811	0.6102	0.8777	0.6128	0.5468
breast	0.74371	0.7179	0.7295	0.7079	0.7433	0.7219	0.6495	0.7	0.747	0.7304	0.7221	0.7071	0.7083	0.7481	0.7111	0.7293	0.7261	0.7395	0.7221
bupa	0.607579	0.5842	0.5326	0.6137	0.5273	0.5988	0.5848	0.585	0.5326	0.5774	0.5626	0.6433	0.62	0.5682	0.6159	0.5241	0.6149	0.5479	0.5756
chess	0.970583	0.9856	0.8564	0.984	0.853	0.9596	0.8648	0.9843	0.8717	0.9634	0.8539	0.9653	0.9822	0.8652	0.9819	0.8652	0.9825	0.8686	0.8971
cleveland	0.584069	0.5364	0.5124	0.5467	0.5465	0.57	0.5566	0.5362	0.5703	0.549	0.5631	0.573	0.5524	0.5563	0.5599	0.5632	0.523	0.55	0.5528
coil2000	0.940033	0.9384	0.9036	0.94	0.9096	0.932	0.8992	0.9387	0.9135	0.9383	0.9342	0.9275	0.9393	0.9136	0.9317	0.9169	0.9389	0.9197	0.9353
crx	0.852802	0.8526	0.7788	0.857	0.7868	0.8482	0.8067	0.8571	0.7808	0.857	0.8065	0.8511	0.8617	0.7793	0.8615	0.785	0.8587	0.7779	0.8448
dermatology	0.954996	0.9209	0.8571	0.9098	0.8796	0.918	0.938	0.924	0.8397	0.9047	0.9074	0.9633	0.6414	0.8632	0.9184	0.8878	0.6505	0.855	0.9581
flare	0.741986	0.7299	0.7364	0.7224	0.7392	0.7485	0.6594	0.7298	0.7392	0.7176	0.7307	0.4165	0.7289	0.7214	0.7308	0.743	0.7177	0.7186	0.4212
glass	0.535034	0.5437	0.4454	0.5746	0.5079	0.5079	0.5933	0.5687	0.5072	0.5465	0.4737	0.6276	0.5447	0.4397	0.5635	0.4823	0.5296	0.4559	0.5636
haberman	0.715376	0.7153	0.7313	0.7288	0.7482	0.7447	0.6761	0.7089	0.7545	0.7157	0.7319	0.6439	0.7385	0.7482	0.7282	0.7515	0.7156	0.7448	0.6476
heart	0.792593	0.7556	0.8222	0.7704	0.8481	0.8296	0.7852	0.7556	0.8296	0.7704	0.8148	0.7667	0.737	0.8222	0.7704	0.8407	0.7037	0.8259	0.7556
housevotes	0.947538	0.9475	0.8856	0.9531	0.8838	0.9037	0.9078	0.9531	0.8914	0.9112	0.8933	0.9525	0.9448	0.8896	0.9531	0.9063	0.9342	0.8874	0.9142
iris	0.926667	0.92	0.9067	0.9133	0.9467	0.9533	0.9267	0.9133	0.9467	0.94	0.9267	0.9333	0.8	0.8333	0.9067	0.94	0.76	0.8533	0.8933
led7digit	0.666	0.688	0.624	0.652	0.648	0.682	0.636	0.676	0.682	0.676	0.646	0.674	0.644	0.682	0.682	0.68	0.62	0.67	0.666
lymphography	0.77521	0.7587	0.1747	0.7444	0.4067	0.7442	0.7439	0.7315	0.6082	0.7331	0.4796	0.7582	0.7258	0.6958	0.7445	0.6724	0.7058	0.5909	0.7457
magic	0.834911	0.838	0.7258	0.8385	0.7259	0.8016	0.795	0.8411	0.7283	0.8283	0.7308	0.8555	0.8369	0.7286	0.8456	0.728	0.8368	0.7285	0.826
mammographic	0.849682	0.8438	0.8	0.8437	0.8024	0.83	0.762	0.8425	0.8108	0.8125	0.8071	0.7907	0.8487	0.8048	0.8352	0.8084	0.8375	0.812	0.8099
movement_libras	0.513889	0.4083	0.4944	0.4639	0.525	0.4917	0.6917	0.4889	0.5056	0.3611	0.425	0.5417	0.3	0.4417	0.425	0.4611	0.3056	0.4444	0.45
mushroom	0.998573	0.9996	0.946	0.9996	0.9445	0.9995	0.9991	0.9995	0.9467	0.9995	0.9515	0.9107	0.9986	0.9465	0.9991	0.9453	0.9982	0.9482	0.9107
nursery	0.94838	0.9377	0.8711	0.9363	0.9005	0.9212	0.8357	0.9362	0.9004	0.9228	0.8957	0.3955	0.8752	0.8927	0.9382	0.8964	0.895	0.8996	0.3955
page-blocks	0.962172	0.9635	0.8704	0.9618	0.8949	0.9289	0.9461	0.9635	0.8918	0.9541	0.9417	0.9649	0.9289	0.9	0.9622	0.9002	0.9328	0.8783	0.9485
penbased	0.949507	0.9409	0.8517	0.9391	0.8542	0.9729	0.9901	0.9431	0.8543	0.9385	0.855	0.975	0.9352	0.8593	0.9485	0.8543	0.9349	0.8591	0.9745
phoneme	0.822535	0.8137	0.7467	0.8218	0.7489	0.8029	0.847	0.8249	0.7581	0.8177	0.7739	0.839	0.8166	0.7593	0.8275	0.7506	0.8087	0.7574	0.8329
pima	0.680938	0.7252	0.7229	0.7123	0.7307	0.7305	0.6694	0.7045	0.7463	0.7318	0.7138	0.7213	0.7109	0.754	0.7085	0.7242	0.6847	0.7385	0.7318
ring	0.976216	0.8754	0.9795	0.8784	0.9796	0.9089	0.7104	0.8881	0.9793	0.7326	0.8892	0.9027	0.8712	0.9797	0.8943	0.9796	0.8745	0.9799	0.7086
satimage	0.843658	0.827	0.7915	0.8407	0.7953	0.8693	0.8862	0.8438	0.7969	0.8437	0.7989	0.883	0.8311	0.7941	0.8528	0.795	0.8337	0.7939	0.8808
segment	0.934632	0.9303	0.7416	0.9385	0.7918	0.9416	0.9411	0.9381	0.8022	0.9359	0.8022	0.9476	0.9186	0.7355	0.9329	0.7957	0.9173	0.7364	0.9446
spambase	0.913862	0.8999	0.8292	0.9052	0.8284	0.9052	0.8695	0.9073	0.8284	0.8801	0.7981	0.931	0.9004	0.8145	0.9117	0.8308	0.8999	0.8327	0.8982
spectfheart	0.733903	0.7496	0.6822	0.7538	0.667	0.7121	0.7127	0.7644	0.693	0.7085	0.7043	0.7826	0.7412	0.5695	0.7608	0.7083	0.7068	0.5692	0.7272
splice	0.951411	0.9166	0.9323	0.9176	0.9492	0.9188	0.7154	0.9157	0.9505	0.8721	0.9235	0.5154	0.9147	0.9448	0.9201	0.9455	0.9116	0.9467	0.4956
thyroid	0.994444	0.9946	0.8968	0.9947	0.9313	0.9521	0.9183	0.9944	0.9317	0.9435	0.9335	0.9896	0.9913	0.9061	0.9939	0.931	0.9918	0.9115	0.9397
tic-tac-toe	0.771316	0.761	0.6691	0.7495	0.6973	0.763	0.7923	0.7641	0.7025	0.7224	0.6921	0.6326	0.7682	0.6994	0.7745	0.6973	0.7578	0.6983	0.6504
titanic	0.779194	0.7787	0.7733	0.7783	0.7733	0.7792	0.6407	0.7783	0.7733	0.6928	0.7088	0.7229	0.7837	0.7733	0.7797	0.7733	0.7806	0.7733	0.657
twonorm	0.972973	0.8255	0.9772	0.8323	0.9774	0.9701	0.9439	0.8743	0.9772	0.8458	0.9769	0.9142	0.8297	0.9772	0.8778	0.9776	0.8304	0.9769	0.9119
wine	0.966013	0.8415	0.9605	0.8255	0.9549	0.966	0.9275	0.9039	0.9778	0.8987	0.9719	0.9382	0.6895	0.9327	0.8817	0.9833	0.6788	0.9042	0.9438
wisconsin	0.957855	0.9443	0.9563	0.9474	0.9607	0.9666	0.9535	0.9502	0.9637	0.9387	0.9548	0.9476	0.9402	0.9637	0.9431	0.9577	0.9297	0.9666	0.9547
zoo	0.838056	0.8231	0.9142	0.8256	0.9089	0.9133	0.9331	0.7781	0.8931	0.8008	0.8233	0.9222	0.7461	0.8744	0.7731	0.8711	0.7631	0.8672	0.8317
	Self - Cascade(NB,C45)	Self-Training (C45)	Self-Training (NB)	Co-Training (C45)	Co-Training (NB)	Democratic-Co	SETRED	TriTraining (C45)	TriTraining (NB)	DE-TriTraining (C45)	DE-TriTraining (NB)	CoForest	Rasco (C45)	Rasco (NB)	Co-Bagging (C45)	Co-Bagging (NB)	Rel-Rasco (C45)	Rel-Rasco (NB)	ADE-CoForest
AVERAGE ACCURACY	0.829585	0.812602	0.763605	0.815325	0.782207	0.824823	0.798527	0.817278	0.790137	0.796377	0.775473	0.785667	0.789417	0.778028	0.81831	0.78982	0.783398	0.77607	0.759155

## Sheet: Labeled Ratio = 40%
Datasets	Self - Cascade(NB,C45)	Self-Training (C45)	Self-Training (NB)	Co-Training (C45)	Co-Training (NB)	Democratic-Co	SETRED	TriTraining (C45)	TriTraining (NB)	DE-TriTraining (C45)	DE-TriTraining (NB)	CoForest	Rasco (C45)	Rasco (NB)	Co-Bagging (C45)	Co-Bagging (NB)	Rel-Rasco (C45)	Rel-Rasco (NB)	ADE-CoForest
appendicitis	0.849091	0.8018	0.8291	0.8	0.84	0.8591	0.7564	0.7718	0.8309	0.8673	0.8582	0.8382	0.8227	0.8773	0.8382	0.8109	0.8018	0.8764	0.8873
automobile	0.570327	0.576	0.5009	0.6168	0.5425	0.5537	0.6089	0.6151	0.5404	0.4836	0.4336	0.6621	0.6049	0.4677	0.6009	0.5265	0.5836	0.5006	0.5063
banana	0.880755	0.8828	0.6006	0.8785	0.6128	0.8811	0.8649	0.8825	0.614	0.8847	0.6068	0.5372	0.8819	0.6136	0.8836	0.6142	0.8798	0.6126	0.5462
breast	0.725446	0.7046	0.7332	0.7082	0.7395	0.7257	0.6632	0.7009	0.7543	0.6977	0.747	0.6963	0.7043	0.74	0.7289	0.7508	0.6936	0.7358	0.722
bupa	0.628317	0.6546	0.5212	0.6002	0.533	0.6035	0.5874	0.657	0.5391	0.6132	0.5454	0.6267	0.6396	0.5556	0.618	0.5482	0.5971	0.5795	0.59
chess	0.982797	0.9853	0.8573	0.9856	0.8592	0.9712	0.8795	0.9872	0.8724	0.97	0.8555	0.9681	0.9884	0.8705	0.9872	0.8664	0.9891	0.8686	0.9158
cleveland	0.565643	0.5093	0.5234	0.5364	0.5704	0.529	0.5586	0.5289	0.5261	0.5216	0.5632	0.5826	0.5152	0.5526	0.5627	0.5662	0.5227	0.573	0.5926
coil2000	0.940033	0.9401	0.9005	0.9395	0.904	0.9327	0.8982	0.9399	0.9104	0.9385	0.9312	0.9272	0.9397	0.9092	0.9354	0.9133	0.9396	0.8702	0.9337
crx	0.854226	0.8465	0.7818	0.8556	0.7926	0.8424	0.8161	0.8527	0.7822	0.8571	0.7988	0.8606	0.8495	0.7729	0.8587	0.7898	0.8496	0.7777	0.8555
dermatology	0.966111	0.9385	0.8935	0.9159	0.8797	0.9439	0.9466	0.9353	0.8739	0.899	0.9271	0.9521	0.7128	0.8515	0.9267	0.8853	0.7373	0.8769	0.9467
flare	0.732622	0.728	0.7477	0.7072	0.7093	0.742	0.6679	0.727	0.742	0.7223	0.7364	0.4203	0.7215	0.7345	0.7223	0.742	0.7327	0.7289	0.4034
glass	0.596539	0.5722	0.431	0.6038	0.4587	0.5535	0.6487	0.6718	0.4633	0.5828	0.5002	0.6796	0.5665	0.4398	0.6272	0.4606	0.5723	0.4187	0.6116
haberman	0.721828	0.7186	0.7512	0.7385	0.7415	0.7449	0.6924	0.7218	0.7448	0.7253	0.7385	0.6075	0.7288	0.7514	0.7449	0.7514	0.7318	0.7451	0.6442
heart	0.8	0.7667	0.7963	0.7407	0.8407	0.8259	0.7741	0.7741	0.8407	0.7444	0.8148	0.7704	0.737	0.8333	0.7926	0.8296	0.7481	0.837	0.7222
housevotes	0.958649	0.9586	0.8986	0.9586	0.9023	0.9164	0.9117	0.9591	0.906	0.925	0.9044	0.9693	0.9475	0.8986	0.9702	0.8986	0.9427	0.885	0.9164
iris	0.906667	0.9	0.9067	0.9	0.9467	0.9733	0.9333	0.9067	0.9333	0.94	0.9333	0.9267	0.7467	0.8733	0.9067	0.9467	0.78	0.88	0.9067
led7digit	0.684	0.684	0.622	0.674	0.67	0.682	0.638	0.674	0.684	0.66	0.646	0.69	0.668	0.672	0.688	0.672	0.668	0.66	0.668
lymphography	0.809972	0.7725	0.2652	0.7653	0.4385	0.6496	0.7639	0.7382	0.301	0.6764	0.3343	0.7242	0.7317	0.3361	0.763	0.4695	0.7496	0.3852	0.7118
magic	0.839958	0.8416	0.7256	0.8405	0.7254	0.8111	0.7996	0.8409	0.7277	0.8321	0.7285	0.8606	0.8395	0.7279	0.8532	0.7275	0.8427	0.7277	0.8299
mammographic	0.835375	0.8452	0.7965	0.844	0.8146	0.8267	0.7486	0.8367	0.8168	0.8038	0.8118	0.7763	0.8428	0.8157	0.8352	0.8146	0.8354	0.812	0.7835
movement_libras	0.563889	0.4889	0.5333	0.4611	0.6222	0.6222	0.75	0.5194	0.6139	0.4556	0.5111	0.6611	0.3778	0.5333	0.4889	0.5667	0.3333	0.4944	0.5528
mushroom	0.998733	1	0.9504	1	0.9483	0.9998	0.9998	0.9995	0.9504	1	0.955	0.9096	0.9996	0.9483	0.9993	0.9488	0.9993	0.9473	0.9096
nursery	0.958951	0.9442	0.8764	0.9435	0.8998	0.9307	0.8341	0.9439	0.8996	0.9304	0.8975	0.3931	0.8833	0.8634	0.9433	0.8978	0.9225	0.8975	0.3931
page-blocks	0.969116	0.9677	0.8737	0.9688	0.8953	0.9371	0.9455	0.9673	0.8936	0.9587	0.9424	0.9673	0.9419	0.851	0.9667	0.9101	0.9488	0.7898	0.9528
penbased	0.956695	0.9456	0.8553	0.9451	0.8569	0.9761	0.9904	0.9478	0.8569	0.9452	0.8571	0.9789	0.9432	0.8604	0.9567	0.8564	0.9421	0.8609	0.977
phoneme	0.83067	0.8233	0.7565	0.8261	0.7546	0.8142	0.856	0.8211	0.76	0.8364	0.7715	0.8531	0.8244	0.7631	0.8444	0.757	0.8231	0.7633	0.8397
pima	0.727981	0.7292	0.7255	0.703	0.741	0.7527	0.698	0.7318	0.7436	0.72	0.7332	0.7162	0.7111	0.7514	0.733	0.7384	0.7408	0.7475	0.7306
ring	0.977027	0.8727	0.98	0.8846	0.9796	0.9177	0.7174	0.8953	0.98	0.7442	0.8972	0.9055	0.885	0.9791	0.9095	0.9795	0.8824	0.9793	0.7478
satimage	0.845688	0.8448	0.7921	0.8483	0.7969	0.8738	0.894	0.8545	0.7975	0.8446	0.7984	0.8897	0.8392	0.7941	0.8252	0.7958	0.8286	0.7939	0.8884
segment	0.936364	0.9385	0.7532	0.9398	0.7879	0.9424	0.9446	0.9437	0.7944	0.9407	0.8022	0.955	0.9342	0.7502	0.916	0.7926	0.9377	0.7541	0.9494
spambase	0.92125	0.9056	0.8251	0.9119	0.8262	0.9154	0.878	0.9089	0.8268	0.8888	0.804	0.94	0.9052	0.8092	0.8951	0.8319	0.9091	0.8081	0.903
spectfheart	0.768091	0.7752	0.6933	0.7489	0.6742	0.6972	0.75	0.7604	0.689	0.7604	0.7188	0.7791	0.7456	0.5956	0.737	0.7003	0.7124	0.566	0.7719
splice	0.952351	0.9266	0.9417	0.9276	0.9508	0.9273	0.7201	0.9301	0.952	0.8987	0.927	0.526	0.927	0.948	0.8248	0.9492	0.9285	0.9489	0.4975
thyroid	0.994028	0.994	0.9096	0.9949	0.9361	0.9526	0.9231	0.9944	0.9346	0.9438	0.9314	0.9921	0.9924	0.8974	0.9901	0.9267	0.9926	0.8985	0.9428
tic-tac-toe	0.806853	0.7829	0.6868	0.7797	0.7014	0.7901	0.7975	0.8006	0.7067	0.7599	0.6952	0.6451	0.7881	0.7014	0.7035	0.6973	0.7985	0.7025	0.6587
titanic	0.78783	0.7874	0.7733	0.7856	0.7733	0.7787	0.6407	0.7842	0.7733	0.6951	0.7088	0.7229	0.7842	0.7733	0.7837	0.7733	0.781	0.7733	0.6551
twonorm	0.973919	0.8269	0.9778	0.8358	0.9778	0.9722	0.9454	0.8788	0.978	0.8408	0.9778	0.91	0.8365	0.9777	0.8597	0.9782	0.8389	0.9778	0.9207
wine	0.96634	0.8866	0.9775	0.8987	0.9549	0.9605	0.9441	0.8755	0.9601	0.9157	0.9549	0.9373	0.7624	0.9438	0.7866	0.9431	0.8147	0.916	0.9487
wisconsin	0.959261	0.9606	0.9547	0.9417	0.9622	0.9695	0.9623	0.9474	0.9593	0.9535	0.9563	0.9505	0.9475	0.9622	0.9284	0.9578	0.9447	0.9607	0.9621
zoo	0.890833	0.8767	0.9075	0.8875	0.9042	0.9117	0.9397	0.9075	0.8997	0.8556	0.8556	0.9089	0.9042	0.8817	0.7456	0.8817	0.8683	0.875	0.885
	Self - Cascade(NB,C45)	Self-Training (C45)	Self-Training (NB)	Co-Training (C45)	Co-Training (NB)	Democratic-Co	SETRED	TriTraining (C45)	TriTraining (NB)	DE-TriTraining (C45)	DE-TriTraining (NB)	CoForest	Rasco (C45)	Rasco (NB)	Co-Bagging (C45)	Co-Bagging (NB)	Rel-Rasco (C45)	Rel-Rasco (NB)	ADE-CoForest
AVERAGE ACCURACY	0.840856	0.822608	0.77065	0.821048	0.786625	0.83024	0.807217	0.828342	0.784318	0.805823	0.77776	0.790435	0.803045	0.771952	0.817028	0.786667	0.80362	0.770142	0.769513
